# Supplementary material for: Earmarking Donations to Charity: Cross-cultural Evidence on Its Appeal to Donors Across 25 Countries
Source: Atypon-hosted journal article supplement (doi:10.1287/mnsc.2019.3397), 2019-11-26
Supplement: mnsc.2019.3397.sm1.pdf [file mnsc.2019.3397.sm1.pdf]

Electronic Companion—“Earmarking donations to charity: Cross-cultural evidence on its appeal to donors across 25 countries” by Christoph Fuchs, Martijn G. de Jong, and Martin Schreier, Management Science

---

**Online Appendix A**

**Table A-1.** Robustness Checks: Descriptive Statistics of the Country-level Variables

|                                  | Mean  | SD   | Min   | Max   |
|----------------------------------|-------|------|-------|-------|
| <i>Gini index</i>                | 38.40 | 8.74 | 24.90 | 62.50 |
| <i>log(GDP/capita)</i>           | 10.19 | 0.66 | 8.79  | 11.40 |
| <i>Trade freedom</i>             | 83.11 | 6.57 | 69.40 | 90.00 |
| <i>Labor force participation</i> | 60.54 | 5.55 | 49.00 | 69.00 |

**Table A-2a.** Robustness Checks: Socioeconomic Variables (Study 1)

|                                                     | <i>Donation decision</i> (stage 1) |                     |                     |                     | <i>Donation amount</i> (stage 2) |                     |                     |                     |
|-----------------------------------------------------|------------------------------------|---------------------|---------------------|---------------------|----------------------------------|---------------------|---------------------|---------------------|
|                                                     | Model 1a                           | Model 2a            | Model 3a            | Model 4a            | Model 1b                         | Model 2b            | Model 3b            | Model 4b            |
| Intercept                                           | -0.551<br>(0.889)                  | -1.204<br>(1.637)   | -0.258<br>(1.413)   | -2.372*<br>(1.451)  | -0.038<br>(0.148)                | 0.033<br>(0.386)    | -0.062<br>(0.277)   | -0.024<br>(0.259)   |
| <i>Autonomy-Embeddedness</i>                        | -0.742***<br>(0.269)               | -0.374<br>(0.275)   | -0.387<br>(0.259)   | -0.441*<br>(0.262)  | 0.027<br>(0.046)                 | 0.025<br>(0.042)    | 0.020<br>(0.038)    | 0.022<br>(0.037)    |
| <i>Egalitarianism-Hierarchy</i>                     | -0.529*<br>(0.265)                 | -0.562*<br>(0.309)  | -0.550*<br>(0.286)  | -0.553**<br>(0.285) | -0.029<br>(0.040)                | -0.028<br>(0.041)   | -0.029<br>(0.040)   | -0.029<br>(0.040)   |
| <i>Harmony-Mastery</i>                              | 0.954**<br>(0.384)                 | 1.073**<br>(0.434)  | 1.099***<br>(0.403) | 1.122**<br>(0.430)  | 0.012<br>(0.067)                 | 0.007<br>(0.068)    | 0.009<br>(0.066)    | 0.010<br>(0.070)    |
| <i>Gini index</i>                                   | -0.037**<br>(0.016)                |                     |                     |                     | 0.001<br>(0.003)                 |                     |                     |                     |
| <i>log(GDP/capita)</i>                              |                                    | -0.074<br>(0.165)   |                     |                     |                                  | -0.005<br>(0.039)   |                     |                     |
| <i>Trade freedom</i>                                |                                    |                     | -0.021<br>(0.016)   |                     |                                  |                     | 0.001<br>(0.003)    |                     |
| <i>Labor force participation</i>                    |                                    |                     |                     | 0.007<br>(0.021)    |                                  |                     |                     | 0.000<br>(0.004)    |
| <i>Earmarking (experimental treatment)</i>          | 0.579***<br>(0.114)                | 0.580***<br>(0.115) | 0.575***<br>(0.119) | 0.570***<br>(0.116) | 0.033<br>(0.021)                 | 0.033<br>(0.021)    | 0.033<br>(0.021)    | 0.033<br>(0.021)    |
| <i>Earmarking</i><br>× <i>Autonomy-Embeddedness</i> | 0.265*<br>(0.140)                  | 0.257*<br>(0.138)   | 0.261*<br>(0.140)   | 0.267*<br>(0.138)   | -0.003<br>(0.027)                | -0.003<br>(0.027)   | -0.003<br>(0.027)   | -0.003<br>(0.027)   |
| Level-one variance                                  |                                    |                     |                     |                     | 0.084***<br>(0.002)              | 0.084***<br>(0.002) | 0.084***<br>(0.002) | 0.084***<br>(0.002) |
| Level-two variance intercept                        | 0.226***<br>(0.098)                | 0.286***<br>(0.118) | 0.271***<br>(0.112) | 0.284***<br>(0.116) | 0.008***<br>(0.003)              | 0.008***<br>(0.003) | 0.008***<br>(0.003) | 0.008***<br>(0.003) |
| Level-two variance <i>Earmarking</i>                | 0.055***<br>(0.041)                | 0.055***<br>(0.039) | 0.055***<br>(0.041) | 0.056***<br>(0.042) | 0.006***<br>(0.002)              | 0.006***<br>(0.002) | 0.006***<br>(0.002) | 0.006***<br>(0.002) |
| Level-two covariance                                | -0.006<br>(0.055)                  | -0.014<br>(0.064)   | -0.015<br>(0.064)   | -0.020<br>(0.064)   | -0.001<br>(0.002)                | -0.001<br>(0.002)   | -0.001<br>(0.002)   | -0.001<br>(0.002)   |

Notes:  $N = 7,118$  participants for stage 1;  $N = 5,938$  for stage 2; reported values are posterior mean estimates (with posterior standard deviations in parentheses). Models 1a, 2a, 3a, and 4a are based on a multilevel logit model for which the dependent variable is *Donation decision*; Models 1b, 2b, 3b, and 4b are based on a multilevel regression model for which the dependent variable is *Donation amount* conditional on *Donation decision*. The models in Tables A-2a and A-2b also contain the same individual-level controls as in our main models in Table 4 (these values of these variables are suppressed because of expository reasons). \* 90% credible interval (CI) does not include zero; \*\* 95% CI does not include zero; \*\*\* 99% CI does not include zero.

**Table A-2b.** Robustness Checks: Socioeconomic Variables (Study 1)

|                                                        | <i>Donation decision (stage 1)</i> |                     |                     |                      | <i>Donation amount (stage 2)</i> |                     |                     |                     |
|--------------------------------------------------------|------------------------------------|---------------------|---------------------|----------------------|----------------------------------|---------------------|---------------------|---------------------|
|                                                        | Model 5a                           | Model 6a            | Model 7a            | Model 8a             | Model 5b                         | Model 6b            | Model 7b            | Model 8b            |
| Intercept                                              | -0.302<br>(0.866)                  | -1.191<br>(2.277)   | -0.095<br>(1.544)   | -2.410*<br>(1.394)   | -0.039<br>(0.149)                | 0.032<br>(0.387)    | -0.062<br>(0.278)   | -0.025<br>(0.260)   |
| <i>Autonomy-Embeddedness</i>                           | -0.662**<br>(0.254)                | -0.310<br>(0.256)   | -0.302<br>(0.232)   | -0.351<br>(0.239)    | 0.026<br>(0.045)                 | 0.024<br>(0.042)    | 0.020<br>(0.037)    | 0.021<br>(0.037)    |
| <i>Egalitarianism-Hierarchy</i>                        | -0.646***<br>(0.223)               | -0.690**<br>(0.266) | -0.668**<br>(0.255) | -0.682***<br>(0.265) | -0.029<br>(0.041)                | -0.027<br>(0.042)   | -0.028<br>(0.041)   | -0.029<br>(0.041)   |
| <i>Harmony-Mastery</i>                                 | 0.954**<br>(0.381)                 | 1.062**<br>(0.433)  | 1.084***<br>(0.405) | 1.121**<br>(0.438)   | 0.012<br>(0.067)                 | 0.007<br>(0.068)    | 0.009<br>(0.066)    | 0.010<br>(0.070)    |
| <i>Gini index</i>                                      | -0.036**<br>(0.017)                |                     |                     |                      | 0.001<br>(0.003)                 |                     |                     |                     |
| <i>log(GDP/capita)</i>                                 |                                    | -0.054<br>(0.236)   |                     |                      |                                  | -0.005<br>(0.039)   |                     |                     |
| <i>Trade freedom</i>                                   |                                    |                     | -0.021<br>(0.018)   |                      |                                  |                     | 0.001<br>(0.003)    |                     |
| <i>Labor force participation</i>                       |                                    |                     |                     | 0.011<br>(0.021)     |                                  |                     |                     | 0.000<br>(0.004)    |
| <i>Earmarking (experimental treatment)</i>             | -0.224<br>(0.292)                  | -0.219<br>(0.297)   | -0.185<br>(0.293)   | -0.202<br>(0.300)    | 0.036<br>(0.056)                 | 0.036<br>(0.056)    | 0.036<br>(0.056)    | 0.036<br>(0.056)    |
| <i>Earmarking</i><br>× <i>Egalitarianism-Hierarchy</i> | 0.398***<br>(0.120)                | 0.395***<br>(0.120) | 0.381***<br>(0.119) | 0.387***<br>(0.122)  | -0.002<br>(0.024)                | -0.002<br>(0.024)   | -0.002<br>(0.024)   | -0.002<br>(0.024)   |
| Level-one variance                                     |                                    |                     |                     |                      | 0.084***<br>(0.002)              | 0.084***<br>(0.002) | 0.084***<br>(0.002) | 0.084***<br>(0.002) |
| Level-two variance intercept                           | 0.223***<br>(0.090)                | 0.288***<br>(0.119) | 0.273***<br>(0.113) | 0.281***<br>(0.116)  | 0.008***<br>(0.003)              | 0.008***<br>(0.003) | 0.008***<br>(0.003) | 0.008***<br>(0.003) |
| Level-two variance <i>Earmarking</i>                   | 0.041***<br>(0.028)                | 0.042***<br>(0.029) | 0.041***<br>(0.028) | 0.042***<br>(0.030)  | 0.006***<br>(0.002)              | 0.006***<br>(0.002) | 0.006***<br>(0.002) | 0.006***<br>(0.002) |
| Level-two covariance                                   | -0.003<br>(0.045)                  | -0.015<br>(0.055)   | -0.014<br>(0.052)   | -0.016<br>(0.053)    | -0.001<br>(0.002)                | -0.001<br>(0.002)   | -0.001<br>(0.002)   | -0.001<br>(0.002)   |

Notes:  $N = 7,118$  participants for stage 1;  $N = 5,938$  for stage 2; reported values are posterior mean estimates (with posterior standard deviations in parentheses). Models 5a, 6a, 7a, and 8a are based on a multilevel logit model for which the dependent variable is *Donation decision*; Models 5b, 6b, 7b, and 8b are based on a multilevel regression model for which the dependent variable is *Donation amount* conditional on *Donation decision*. \* 90% credible interval (CI) does not include zero; \*\* 95% CI does not include zero; \*\*\* 99% CI does not include zero.

**Table A-3.** Relationship between Project Ratings and Cultural Values (Study 1)

|                          | Projects          |                   |                   |                  |                   |
|--------------------------|-------------------|-------------------|-------------------|------------------|-------------------|
|                          | #1                | #2                | #3                | #4               | #5                |
| Autonomy-Embeddedness    | -0.011<br>(0.183) | 0.009<br>(0.140)  | 0.140<br>(0.102)  | 0.072<br>(0.075) | 0.027<br>(0.097)  |
| Egalitarianism-Hierarchy | 0.101<br>(0.170)  | 0.196<br>(0.131)  | -0.066<br>(0.094) | 0.053<br>(0.070) | -0.026<br>(0.090) |
| Harmony-Mastery          | 0.115<br>(0.278)  | -0.010<br>(0.215) | 0.091<br>(0.154)  | 0.043<br>(0.114) | 0.015<br>(0.147)  |

*Notes.*  $N = 7,118$  participants; reported values are posterior mean estimates (with posterior standard deviations in parentheses). Projects #1 through #5 refer to the number of the Red Cross project described in the main study. Equations are based on a multivariate multilevel model (the dependent variables are the Project liking scores). Results for individual-level control variables (*Age, Gender, Education, Socioeconomic status, Average annual donation, Attitude Red Cross, Familiarity Red Cross, Personal Project Relevance*) and the country-level control variable (*Human Development Index*) are suppressed from the table. \* 90% credible interval (CI) does not include zero; \*\* 95% CI does not include zero; \*\*\* 99% CI does not include zero.

**Table A-4.**  
 Relationship between *Decision* not to use the *Earmarking Option* and Cultural Variables (Study 1)

|                                 | Logit             |
|---------------------------------|-------------------|
| <i>Autonomy-Embeddedness</i>    | 0.066<br>(0.264)  |
| <i>Egalitarianism-Hierarchy</i> | 0.314<br>(0.256)  |
| <i>Harmony-Mastery</i>          | -0.534<br>(0.415) |

*Notes:*  $N = 3,605$  participants (i.e., participants in the earmarking condition); reported values are posterior mean estimates (with posterior standard deviations in parentheses). Multilevel logit model for which the dependent variable is *Decision* not to use the *earmarking option* (1 = participant does not select (earmark) project, 0 = participants selects (earmarks) project). Results for individual-level control variables (*Average project ratings*, *SD project ratings*, *Age*, *Gender*, *Education*, *Socioeconomic status*, *Average annual donation*, *Attitude Red Cross*, *Familiarity Red Cross*, *Personal Project Relevance*) and the country-level control variable (*Human Development Index*) are suppressed from the table \* 90% credible interval (CI) does not include zero; \*\* 95% CI does not include zero; \*\*\* 99% CI does not include
